# Supplementary material for: From Shelf to Shelf: Assessing Historical and Contemporary Genetic Differentiation and Connectivity across the Gulf of Mexico in Gag, Mycteroperca microlepis
Source: PLOS journal article supplement (doi:10.1371/journal.pone.0120676), 2015-04-09
Supplement: S1 (10.1371/journal.pone.0120676.s001) [file journal.pone.0120676.s001]

### *Mycteroperca microlepis* mtDNA Control Region

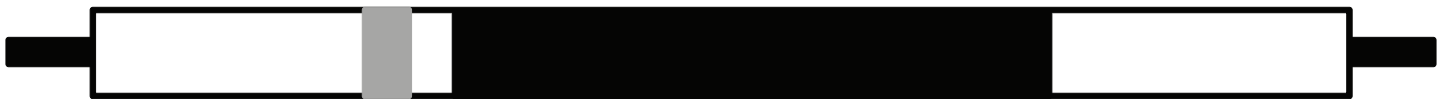

S1 Figure. Diagram of mtDNA Control Region sequence. White region indicates typical sequence, while shaded areas represent indel regions that adhere to a step-wise mutational model. Grey highlights where there is a 9-base repeat indel; black highlights where there is a 40-base repeat indel. Primers were nested within neighboring coding genes for t-RNA protein (thin black lines at the end of the sequence).
