# Supplementary material for: From Shelf to Shelf: Assessing Historical and Contemporary Genetic Differentiation and Connectivity across the Gulf of Mexico in Gag, Mycteroperca microlepis
Source: PLoS One. 2015 Apr 9;10(4):e0120676. doi: 10.1371/journal.pone.0120676 (PMC4391813; doi:10.1371/journal.pone.0120676)
Supplement: S2 Table — N is sample size. L is length of sequence. h is number of haplotypes. H is haplotype diversity. S(all) is number of segregating sites. n is number of substitutions. Θ is Watterson’s (1975) estimate of the population parameter theta (= μNe). π is nucleotide diversity for All and Sequence Only data and average gene diversity for Indels. Significance for Tajima’s D tests and Fu’s Fs indicated by asterisks: * is p-value < 0.05; ** is p-value < 0.01; *** is p-value < 0.001. (XLSX) [file pone.0120676.s005.xlsx]

## Sheet: Sheet1
S2 Table. Summary statistics on all mtDNA aggregate data, sequence only data, and indel only data of Gulf of Mexico gag. N is sample size. L is length of sequence. h is number of haplotypes. H is haplotype diversity. S(all) is number of segregating sites. n is number of substitutions. Θ is Watterson’s (1975) estimate of the population parameter theta (= μNe). π is nucleotide diversity for All and…
	Population	N	L	h	H	S(all)	n	θ	π	Tajima's D	Fu's Fs
All	Campeche Bank	47	542-781	34	0.9806	382	33	7.472	0.1	-2.315**	2.57987
	South West Florida Shelf	39	446-755	29	0.9744	310	28	6.583	0.144	-2.06**	3.35429
	North West Florida Shelf	44	417-725	30	0.9579	242	23	5.316	0.111	-1.979**	1.75851
Sequence Only	Campeche Bank	47	536	18	0.877	22	20	4.528	0.00781	-1.574*	-2.896
	South West Florida Shelf	39	536	20	0.8502	19	18	4.257	0.00661	-2.052*	-7.061**
	North West Florida Shelf	44	535	17	0.84	24	23	5.287	0.00760	-1.895*	-7.723**
Indels Only (RFLP)	Campeche Bank	47	9-369	11	0.8363	14	14	3.17	0.142	-1.006	-2.629
	South West Florida Shelf	39	9-258	13	0.883	11	11	2.602	0.173	-0.003	-3.998*
	North West Florida Shelf	44	9-209	8	0.7981	7	7	1.609	0.0962	-0.281	-1.778
